# Supplementary material for: IL11-mediated stromal cell activation may not be the master regulator of pro-fibrotic signaling downstream of TGFβ
Source: PubMed Central journal article supplement (PMC10917968; doi:10.3389/fimmu.2024.1293883), 2024-02-22
Supplement: DataSheet_1.pdf [file DataSheet_1.pdf]

**Table S1**

| Human IL-11       |                      |                      | Mouse IL-11       |                      |                      |
|-------------------|----------------------|----------------------|-------------------|----------------------|----------------------|
| $k_a$ (1/Ms)      | $k_d$ (1/s)          | $K_D$ (M)            | $k_a$ (1/Ms)      | $k_d$ (1/s)          | $K_D$ (M)            |
| $3.5 \times 10^5$ | $1.4 \times 10^{-3}$ | $3.9 \times 10^{-9}$ | $1.2 \times 10^5$ | $2.1 \times 10^{-3}$ | $1.7 \times 10^{-9}$ |
